# Supplementary material
Source: PubMed Central journal article supplement (PMC3399959)
Supplement: NIHMS363193-supplement-01.pdf [file NIHMS363193-supplement-01.pdf]

**Social Dominance in Female Monkeys:  
Dopamine Receptor Function and Cocaine Reinforcement**

***Supplemental Information***

**Table S1.** Effects of menstrual cycle phase on homovanillic acid concentrations (pmol/ml) in individually housed female monkeys.

| <b>Monkey</b> | <b>Follicular phase</b> | <b>Luteal phase</b> |
|---------------|-------------------------|---------------------|
| <b>6804</b>   | <b>1357.64</b>          | <b>1517.50</b>      |
| <b>6812</b>   | <b>1068.64</b>          | <b>1089.21</b>      |
| <b>7371</b>   | <b>1129.47</b>          | <b>1220.12</b>      |
| <b>7373</b>   | <b>754.33</b>           | <b>673.39</b>       |
| <b>7376</b>   | <b>1322.86</b>          | <b>1503.86</b>      |
| <b>7377</b>   | <b>1094.66</b>          | <b>1066.11</b>      |
| <b>7370</b>   | <b>1203.20</b>          | <b>1200.48</b>      |
| <b>7372</b>   | <b>1327.49</b>          | <b>1291.63</b>      |
| <b>7374</b>   | <b>1877.68</b>          | <b>1543.37</b>      |
| <b>6816</b>   | <b>962.30</b>           | <b>897.62</b>       |
| <b>6817</b>   | <b>931.63</b>           | <b>911.46</b>       |
| <b>7375</b>   | <b>1150.45</b>          | <b>1235.73</b>      |
| <b>Mean</b>   | <b>1181.70</b>          | <b>1179.21</b>      |
| <b>SEM</b>    | <b>81.39</b>            | <b>77.76</b>        |
